# Supplementary material for: Discovery of Small-Molecule Inhibitors of SARS-CoV-2 Proteins Using a Computational and Experimental Pipeline
Source: PubMed Central journal article supplement (PMC8315004; doi:10.3389/fmolb.2021.678701), 2021-07-09

## *Supplementary Material*

### 1 Supplementary Data

Edmond Y. Lau<sup>1</sup>, Oscar A. Negrete<sup>2</sup>, W. F. Drew Bennett<sup>1</sup>, Brian J. Bennion<sup>1</sup>, Monica Borucki<sup>1</sup>, Feliza Bourguet<sup>1</sup>, Aidan Epstein<sup>3</sup>, Magdalena Franco<sup>1</sup>, Brooke Harmon<sup>4</sup>, Stewart He<sup>3</sup>, Derek Jones<sup>3</sup>, Hyojin Kim<sup>5</sup>, Daniel Kirshner<sup>1</sup>, Victoria Lao<sup>1</sup>, Jacky Lo<sup>1</sup>, Kevin McLoughlin<sup>3</sup>, Richard Mosesso<sup>4</sup>, Deepa K. Muruges<sup>1</sup>, Edwin A. Saada<sup>4</sup>, Brent Segelke<sup>1</sup>, Maxwell A. Stefan<sup>4</sup>, Garrett A. Stevenson<sup>6</sup>, Marisa W. Torres<sup>3</sup>, Dina R. Weilhammer<sup>1</sup>, Sergio Wong<sup>1</sup>, Yue Yang<sup>1</sup>, Adam Zemla<sup>3</sup>, Xiaohua Zhang<sup>1</sup>, Fangqiang Zhu<sup>1</sup>, Jonathan E. Allen<sup>3</sup>, Felice C. Lightstone<sup>1\*</sup>

<sup>1</sup>Lawrence Livermore National Laboratory, Physical Life Sciences Directorate, Biotechnology and Biosciences Division, Livermore, CA, 94550 USA

<sup>2</sup>Sandia National Laboratory, Department of Biotechnologies and Bioengineering, Livermore, CA, 94550 USA

<sup>3</sup>Lawrence Livermore National Laboratory, Computing Directorate, Global Security Computing Division, Livermore, CA, 94550 USA

<sup>4</sup>Sandia National Laboratory, Department Systems Biology, Livermore, CA, 94550 USA

<sup>5</sup>Lawrence Livermore National Laboratory, Computing Directorate, Center for Applied Scientific Computing, Livermore, CA, 94550 USA

<sup>6</sup>Lawrence Livermore National Laboratory, Engineering Directorate, Computational Engineering Division, Livermore, CA, 94550 USA

**\* Correspondence:**

Felice Lightstone

[lightstone1@llnl.gov](mailto:lightstone1@llnl.gov)

### 2 Supplementary Figures and Tables

Data and results from this study are publicly available at <https://covid19drugscreen.llnl.gov>.

**Table S1:** Total number of simulations used to obtain average MM/GBSA energies for individual compound-protein complexes. The top five docked poses for the individual complex-protein (if all made the minimum energy cutoff) were used for molecular dynamics simulations. Four replicate simulations were performed on the top dock pose and two replicate simulations were performed on the remaining dock poses. The trajectories were pooled to obtain an average MM/GBSA energy for an individual compound-protein complex.

|                  | <b>Drug compounds</b> | <b>Docked poses</b> | <b>Total MD simulations</b> |
|------------------|-----------------------|---------------------|-----------------------------|
| <b>Protease1</b> | 914                   | 3810                | 9446                        |
| <b>Protease2</b> | 934                   | 3875                | 9618                        |
| <b>Spike1</b>    | 134                   | 652                 | 1572                        |
| <b>Spike2</b>    | 50                    | 250                 | 600                         |

**Table S2:** Description of AMPL models used to predict pharmacokinetic and safety properties. All data presented in the manuscript is available at <https://covid19drugscreen.llnl.gov>.

| <b>Description</b>                                                   | <b>Dataset size</b> | <b>Public</b> |
|----------------------------------------------------------------------|---------------------|---------------|
| log solubility                                                       | 732                 |               |
| Solubility                                                           | 732                 |               |
| log10 human plasma protein fraction unbound                          | 3300                |               |
| pIC50 for sodium channel NaV1.5 inhibition                           | 3946                |               |
| plasma protein binding fraction unbound, human serum albumin         | 123759              |               |
| log10 rat microsomal clearance rate                                  | 30563               |               |
| log10 plasma protein binding fraction unbound, human serum albumin   | 123734              |               |
| pIC50 for cytochrome P450 CYP3A4 inhibition                          | 112660              |               |
| logD distribution coefficient                                        | 27345               |               |
| pIC50 for hERG potassium channel inhibition                          | 47251               |               |
| log10 human plasma protein binding fraction unbound, alternate model | 3019                |               |
| log10 rat plasma protein binding fraction unbound                    | 3394                |               |
| pIC50 for bile salt export pump inhibition                           | 1149                |               |
| log10 human microsomal clearance rate                                | 29162               |               |
| log10 steady state volume of distribution in humans                  | 970                 | public        |
| log10 human microsomal clearance rate, alternate model               | 1102                | public        |
| pIC50 for aurora kinase A inhibition                                 | 1791                | public        |
| pIC50 for aurora kinase B inhibition                                 | 1791                | public        |
| pIC50 for muscarinic acetylcholine receptor M1 inhibition            | 829                 | public        |
| pIC50 for muscarinic acetylcholine receptor M2 inhibition            | 535                 | public        |

|                                                                   |                |        |
|-------------------------------------------------------------------|----------------|--------|
| pIC50 for muscarinic acetylcholine receptor M3 inhibition         | 857            | public |
| pIC50 for histamine receptor H1 inhibition                        | 328            | public |
| pIC50 for Kv1.5 potassium channel inhibition                      | 767            | public |
| pIC50 for sodium channel NaV1.5 inhibition, alternate model       | 1729           | public |
| log10 steady state volume of distribution in humans, public model | 970            | public |
| pIC50 for bile salt export pump inhibition, public model          | 1120           | public |
| pIC50 for hERG potassium channel inhibition, public model         | 14023          | public |
| mm/gbsa for spike1                                                | 186235         | public |
| mm/gbsa for protease2                                             | 195379         | public |
| mm/gbsa for protease1                                             | 194814         | public |
| pIC50 for caspase 1 inhibition                                    | 598            | public |
| pIC50 for caspase 3 inhibition                                    | 2063           | public |
| pIC50 for cathepsin K inhibition                                  | 1506           | public |
| pIC50 for cathepsin L1 inhibition                                 | 1633           | public |
| pIC50 for cytochrome p450 3A4 inhibition, public model            | 6515           | public |
| pIC50 for hERG potassium channel inhibition, public model 2       | 11920          | public |
| qualitative estimate of druglikeness                              | rdkit function | public |
| synthetic accessibility score                                     | rdkit function | public |

**Table S3:** Inhibition of pseudovirus by computationally selected spike binding compounds.

| <b>Compound</b>          | <b>%Infection</b> |              | <b>%Inhibition</b> | <b>%Inhibition</b>  |
|--------------------------|-------------------|--------------|--------------------|---------------------|
| <b>Name</b>              | <b>AVG</b>        | <b>Stdev</b> | <b>AVG</b>         | <b>No NegValues</b> |
| Phenolphthalein          | 119.0             | 18.4         | -19.0              | 0.0                 |
| Novobioicin Sodium       | 117.4             | 35.9         | -17.4              | 0.0                 |
| Prednisone               | 126.6             | 19.7         | -26.6              | 0.0                 |
| Ketanserin               | 142.6             | 29.4         | -42.6              | 0.0                 |
| Chlortalidone            | 118.1             | 16.4         | -18.1              | 0.0                 |
| Adapalene                | 104.8             | 29.0         | -4.8               | 0.0                 |
| Bendroflumethiazide      | 134.2             | 38.4         | -34.2              | 0.0                 |
| Olaparib                 | 128.2             | 33.0         | -28.2              | 0.0                 |
| Fluorescein              | 536.3             | 242.3        | -436.3             | 0.0                 |
| Ethinyl estradiol        | 127.7             | 44.8         | -27.7              | 0.0                 |
| Olmesartan Medoxomil     | 104.0             | 22.8         | -4.0               | 0.0                 |
| Nilotinib                | 83.3              | 29.0         | 16.7               | 16.7                |
| Darifenacin HBr          | 96.9              | 41.8         | 3.1                | 3.1                 |
| Lumacaftor               | 121.3             | 22.8         | -21.3              | 0.0                 |
| Mestranol                | 147.6             | 45.6         | -47.6              | 0.0                 |
| Dutasteride              | 61.3              | 18.9         | 38.7               | 38.7                |
| Ciclesonide              | 184.6             | 26.1         | -84.6              | 0.0                 |
| Etravirine               | 99.3              | 17.4         | 0.7                | 0.7                 |
| Pazopanib                | 94.0              | 10.2         | 6.0                | 6.0                 |
| Rilpivirine              | 73.3              | 34.7         | 26.7               | 26.7                |
| Lapatinib Ditosylate     | 55.4              | 14.3         | 44.6               | 44.6                |
| Imatinib                 | 8.6               | 6.0          | 91.4               | 91.4                |
| Mizolastine              | 103.5             | 7.4          | -3.5               | 0.0                 |
| Raltegravir              | 119.6             | 38.6         | -19.6              | 0.0                 |
| Ivacaftor                | 228.8             | 18.5         | -128.8             | 0.0                 |
| Nalmefene hydrochloride  | 104.0             | 24.0         | -4.0               | 0.0                 |
| Troglitazone             | 103.0             | 28.0         | -3.0               | 0.0                 |
| Zafirlukast              | 110.5             | 25.1         | -10.5              | 0.0                 |
| Icotinib                 | 130.2             | 16.8         | -30.2              | 0.0                 |
| Vorapaxar                | 143.0             | 50.2         | -43.0              | 0.0                 |
| Ajmaline                 | 90.6              | 9.3          | 9.4                | 9.4                 |
| Gestrinone               | 90.2              | 12.1         | 9.8                | 9.8                 |
| Trametinib DM SO solvate | 97.6              | 17.4         | 2.4                | 2.4                 |
| Tasosartan               | 115.2             | 26.9         | -15.2              | 0.0                 |
| Ace2-Fc                  | 8.0               | 3.4          | 92.0               | 92.0                |
| No Treatment             | 100.0             | 1.9          | 0.0                | 0.0                 |

## 2.1 Supplementary Figures

Figure S1:

A

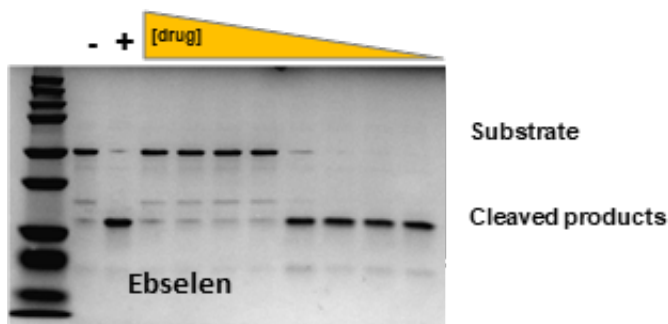

B

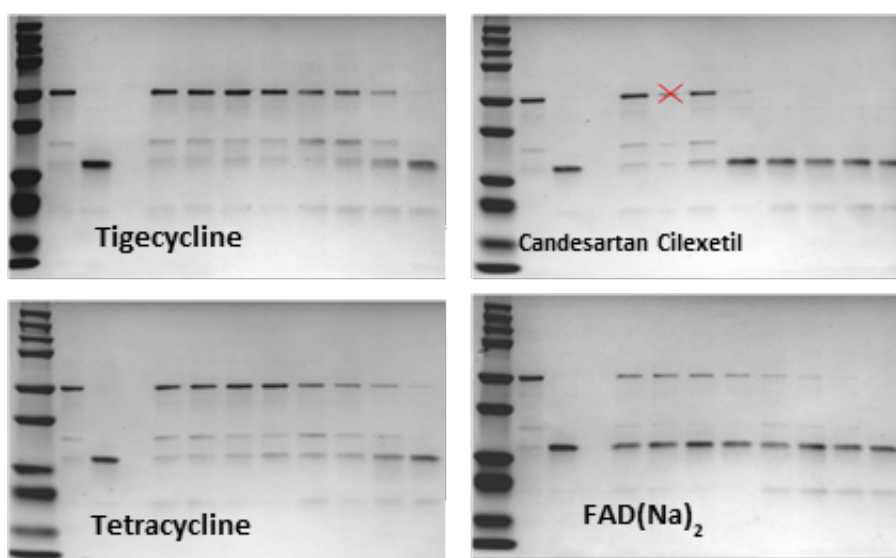

**Figure S1.** Gel electrophoresis analysis used for densitometry-based normalization of  $M^{pro}$  inhibitor  $IC_{50}$  data. (A) Ebselen was used as a control  $M^{pro}$  inhibitor against the FRET-based substrate and the cleavage products from the  $IC_{50}$  studies shown in Figure 1D were analyzed by gel electrophoresis and Coomassie staining. (B) The  $M^{pro}$  inhibitor hits were also analyzed similarly to Ebselen. Negative (-) controls indicate no protease conditions and positive (+) controls indicate no drug treatment conditions. Decreasing concentrations of inhibitors are shown from left-to-right on the gels.

**Table S4:** Computationally selected  $M^{pro}$  binders ability to inhibit in FRET-based activity assay.

| Screen ID | Compound name | Normalized Percent FRET inhibition |
|-----------|---------------|------------------------------------|
| 1         | Pyronaridine  | -8.326469859                       |

|    |                                     |              |
|----|-------------------------------------|--------------|
| 2  | Acarbose                            | -3.443413545 |
| 3  | Alvimopan                           | -3.261275118 |
| 4  | Ethynyl estradiol                   | -3.167551476 |
| 5  | Imatinib                            | -2.881543041 |
| 6  | Hyaluronic acid                     | -2.844182585 |
| 7  | Maraviroc                           | -2.689853634 |
| 8  | Rupatadine Fumarate                 | -2.414611759 |
| 9  | Dutasteride                         | -2.375936492 |
| 10 | Irinotecan hydrochloride trihydrate | -2.220367155 |
| 11 | Azilsartan Medoxomil                | -1.990101712 |
| 12 | Atazanavir                          | -1.967080129 |
| 13 | Tasosartan                          | -1.956784917 |
| 14 | Ibrutinib                           | -1.908657901 |
| 15 | Darunavir Ethanolate                | -1.838476805 |
| 16 | Ketoconazole                        | -1.797246341 |
| 17 | Risperidal                          | -1.672488216 |
| 18 | Lapatinib Ditosylate                | -1.574075912 |
| 19 | Periplocin                          | -1.535996031 |
| 20 | Fluocinonide                        | -1.512130985 |
| 21 | Ezetimibe                           | -1.341180848 |
| 22 | Saquinavir                          | -1.335400645 |
| 23 | Cefmenoxime hydrochloride           | -1.303795584 |
| 24 | Efonidipine                         | -1.161647234 |
| 25 | Mestranol                           | -1.101041925 |
| 26 | Pazopanib                           | -0.95532126  |
| 27 | Ouabain octahydrate                 | -0.947829323 |
| 28 | Ivermectin                          | -0.915827338 |
| 29 | Azlocillin sodium                   | -0.914760605 |
| 30 | MALTOTETRAOSE                       | -0.905532126 |
| 31 | Etravirine                          | -0.894666336 |
| 32 | Isavuconazole                       | -0.885661126 |
| 33 | Olmutinib                           | -0.794889606 |
| 34 | Ginkgolide C                        | -0.741850657 |
| 35 | Icotinib                            | -0.627933515 |
| 36 | Rutin                               | -0.553634334 |
| 37 | Tacrolimus                          | -0.416745225 |
| 38 | Vorapaxar                           | -0.416199454 |
| 39 | Sofosbuvir                          | -0.399751923 |
| 40 | Ciclesonide                         | -0.393053833 |
| 41 | Diosmin                             | -0.377797073 |
| 42 | Etoposide                           | -0.323666584 |
| 43 | Mizolastine                         | -0.317166956 |

|    |                                   |              |
|----|-----------------------------------|--------------|
| 44 | Cefoperazone                      | -0.306673282 |
| 45 | Lomerizine hydrochloride          | -0.276531878 |
| 46 | Dasatinib                         | -0.250409328 |
| 47 | Novobiocin Sodium                 | -0.227809477 |
| 48 | Regadenoson                       | -0.187670553 |
| 49 | Fluocinolone acetonide            | 0.024906971  |
| 50 | Digitoxin                         | 0.196899032  |
| 51 | Adapalene                         | 0.235921608  |
| 52 | Cabozantinib Malate               | 0.386306128  |
| 53 | Vinorelbine                       | 0.454056065  |
| 54 | Paritaprevir                      | 0.757727611  |
| 55 | Doxazosin mesylate                | 0.918977921  |
| 56 | Trametinib DMSO solvate           | 1.515951377  |
| 57 | Eptifibatide acetate              | 2.0560903    |
| 58 | Cefotetan                         | 2.140163731  |
| 59 | Olmesartan Medoxomil              | 2.830166212  |
| 60 | Teniposide                        | 3.019498884  |
| 61 | Fosinopril sodium                 | 3.314735798  |
| 62 | Aprepitant                        | 3.36641032   |
| 63 | Calcium N5-methyltetrahydrofolate | 3.743115852  |
| 64 | Zafirlukast                       | 3.826643513  |
| 65 | Enoxolone                         | 4.005656165  |
| 66 | Vecuronium bromide                | 4.129297941  |
| 67 | Ginsenoside Rg1                   | 4.192259985  |
| 68 | Rilpivirine                       | 5.867228975  |
| 69 | Brigatinib                        | 5.965765319  |
| 70 | ABT199                            | 6.272661871  |
| 71 | Nilotinib                         | 6.659141652  |
| 72 | Cefpiramide acid                  | 7.372587447  |
| 73 | Azelnidipine                      | 8.169957827  |
| 74 | Linagliptin                       | 8.281716696  |
| 75 | Pancuronium bromide               | 10.01384272  |
| 76 | Rocuronium bromide                | 11.30109154  |
| 77 | Bendroflumethiazide               | 11.621161    |
| 78 | Hydroxyzine Pamoate               | 12.92944679  |
| 79 | Calcium Levofolinate              | 13.00131481  |
| 80 | C10 (control)                     | 13.05065741  |
| 81 | Argatroban                        | 13.45514761  |
| 82 | Cefoperazone sodium               | 14.80501116  |
| 83 | Lopinavir                         | 18.16271397  |
| 84 | Eltrombopag Olamine               | 23.71875465  |
| 85 | Nelfinavir Mesylate               | 30.75008683  |

Supplementary Material

|    |                             |             |
|----|-----------------------------|-------------|
| 86 | Tetracycline                | 40.29213595 |
| 87 | Tigecycline                 | 56.53225006 |
| 88 | Simeprevir                  | 72.89630365 |
| 89 | EBSELEN (control)           | 117.2592409 |
|    | Flavin Adenine Dinucleotide |             |
| 90 | Disodium                    | 148.8484247 |
| 91 | Candesartan Cilexetil       | 152.7055321 |
|    | No drug                     | 0           |
|    | Protease only               | 100         |

Italicized are controls

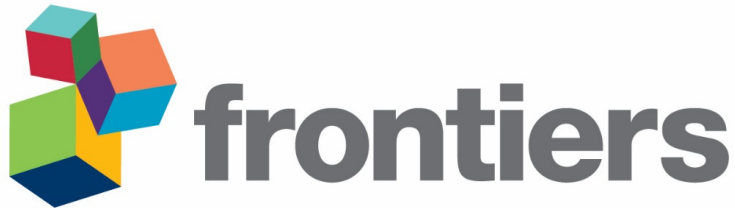

Supplement: DataSheet1.pdf [file DataSheet1.pdf]
